# Supplementary material
Source: Research Square preprint supplement (doi:10.21203/rs.3.rs-9052064/v1)
Supplement: Supplementary file 1 [file 9c3b0bf93c19a07b581ec586.docx]

**Supplementary material**

1. **Domestic supply quantity [element 5301]** is calculated with the following equation: Domestic sugar production + Imports – Exports - Stock variation (changes in stocks) and represents the quantity of a product that is available in a country for various utilizations such as feed (for feeding livestock), seed (used for reproductive purposes such as seed for sowing, plants for transplanting, eggs for hatching), losses, tourist consumption, industrial use (utilization of any food items in any non-food industry), processed (refers to quantities of a commodity that enter some manufacturing process for the Domestic sugar production of a derived food product) and food [element 5142].
2. **Food [element 5142]** refers to the quantities of any product that are AVAILABLE for human consumption expressed in tons. Food is different from consumption because if refers to FOOD AVAILABILITY. The main differences are the following: food includes wastes that occur at the retail or consumer level (differently from consumption, food is not net of wastes), it includes food available for refugees and guest workers, it includes consumption occurring outside the household (restaurants/public places, schools, prisons, hospitals, and military installations…). Estimates of food availability can be derived from other existing datasets measuring food Domestic sugar production or consumption (such as household surveys) by making certain adjustments that take into account these differences.
3. **Sugar Availability quantity (kg/capita/yr)** is calculated dividing Food [element 5142] by the population and expressing the quantities in kilograms.
